# Supplementary material for: Polymorphism at 19q13.41 Predicts Breast Cancer Survival Specifically after Endocrine Therapy
Source: Oxford University Press journal article supplement (doi:10.1158/1078-0432.ccr-15-0296), 2015-05-11
Supplement: 10780432ccr150296-sup-144653_1_supp_2945398_nn41gv.doc [file 10780432ccr150296-sup-144653_1_supp_2945398_nn41gv.doc]

**SUPPLEMENTARY DATA**

**Supplementary Methods**

*Stage-1 patients data*

Samples included in stage-1 discovery dataset came from participants of the HEBCS and POSH studies. For HEBCS GWS, 805 cases were included. Of these, 423 cases originated from a prospective patient series of unselected, incident breast cancer patients treated in the Helsinki University Central Hospital Department of Oncology in years 1997–1998 and 2000 as well as 140 cases collected 2001-2004 and 242 additional familial cases . All familial cases had been tested negative for BRCA1 and BRCA2 . The GWS series was specifically enriched for cases with reduced survival (i.e. distant metastasis or death at the time of the initiation of the study in 2008), resulting in 312 breast cancer specific deaths at the time of analysis. The cancer diagnoses were confirmed through the Finnish Cancer Registry and hospital records. Information on the date and cause of death was obtained from the Finnish Cancer Registry which collects diagnostic and death information on all cancer patients in Finland.

The POSH GWS consisted of 574 participants from the POSH study . Prospective early onset breast cancer cases were included in the POSH study; participants were diagnosed with invasive breast cancer aged 40 years or younger. Recruitments to the POSH cohort were made between January 2000 and January 2008 from oncology clinics across the UK. The vast majority (98%) of patients recruited to the study presented symptomatically. The recruitment, data collection and follow-up procedures for the POSH study participants are described in detail elsewhere . Sample selection for POSH GWS comprised two “extreme phenotype” groups. The first group included selection of triple negative cases (ER, progesterone receptor (PR) and HER2 receptor negative). These triple negative patients have worse prognosis and they relapse early after diagnosis. The second group was enriched for patients with either very short (<2 years) survival or relatively long (>4 years) survival. Sample selection for POSH GWS is described in detail in . All participants of both studies provided written informed consent before participating in the study.

*Stage-2 patients data*

A further 1415 breast cancer patients from the POSH study unselected for any differential survival were included in the stage-2 validation dataset.

As an additional independent validation dataset in stage-2 we used SUCCESS-A, a sub-study of the Simultaneous Study of Gemcitabine-Docetaxel Combination adjuvant treatment, as well as Extended Bisphosphonate and Surveillance-Trial. The data was obtained from the database of Genotypes and Phenotypes (dbGaP) through dbGaP accession [phs000547.v1.p1] . The sample set used here consisted of 3596 samples of the sample series of 3754 patients that were recruited from 2005 to 2007 from 250 study sites across Germany. The dbGaP entry for SUCCESS-A contains the detailed recruitment, data collection and follow-up procedures for the study participants.

***Statistical Analysis***

In stage-1, Cox’s proportional hazards models were used to derive hazard ratios (HR) for breast cancer specific mortality in association with each SNP using post-QC genome wide SNP data and with adjustment for BRCA status (in the HEBCS GWS, POSH GWS and POSH validation series, 6%, 7% and 5% of the cases were known to carry a BRCA1 or BRCA2 mutation, respectively). We applied additive, dominant and recessive models to obtain the analysis estimates in the subgroups of patients receiving endocrine treatment and not receiving endocrine treatment. For the endocrine treatment subgroup we combined patients who had received any anti-estrogen, aromatase inhibitor and LHRH agonist treatments. Follow-up time was calculated from the date of diagnosis to the date of last follow-up or breast cancer related death and right-censored at 10 years (mean follow-up for HEBCS GWS and POSH GWS were 10.6 ± 6.6 years and 4.1± 2.0 years, respectively). Statistical analyses were performed using R.3.0.1 environment. For Cox’s proportional hazards models we used R-package GenABEL. Genome wide meta-analysis was performed using R-package MetABEL .

In stage-2, the follow-up time was calculated from the date of diagnosis to the date of last follow-up or breast cancer related death for POSH validation dataset. For SUCCESS-A the follow-up time was calculated from the date of diagnosis to the date of last follow-up or death from any cause, due to lack of cause-of-death information. Similarly as in stage-1 the follow-up time was right-censored at 10 years (mean follow-up being 5.0± 1.9 years and 3.9± 1.7 years in POSH validation and SUCCESS-A, respectively). Similarly as in stage-1 Cox’s proportional hazards models were used to derive HR in association with each SNP. The meta-analysis of stage-1 and stage-2 were performed with R-package MetABEL .

For HEBCS GWS, POSH GWS and POSH validation we had cause-of-death information that enabled us to evaluate the breast cancer specific survival. For SUCCESS-A the only outcome information was overall survival (endpoint: all-cause mortality) and progression free survival (endpoints: local or metastatic recurrence or death). In order to assess differences in survival effect when using different endpoints, we further conducted a sensitivity analysis. In the sensitivity analysis we analysed the survival across all the four studies using a common endpoint; either 10 year overall survival or 5 year progression free survival.

In stage-1 and stage-2, patients presenting with distant metastases near the time of diagnosis (M1) were excluded from the analysis as they had been extensively treated for metastatic disease. Since the information for oophorectomy was only partial, we excluded all the patients with indication of oophorectomy (HEBCS GWS, POSH GWS and POSH validation). We also excluded 172 non-European subjects from POSH validation.

In order to test for interaction between endocrine treatment and a given SNP of interest, SNP genotype data was fitted into two multivariate Cox's proportional hazards models: one with both endocrine treatment and the SNP represented as individual covariates, and one that included an interaction term between the two. The following clinically relevant covariates were also included in both models: progesterone receptor status, tumor size (T), lymph node metastasis (N), distant metastasis (M), age of diagnosis and tumor histological grade. Since we included TNM as separate covariates in the analysis, the TNM stage as a composite variable has not been included. A likelihood ratio test between models was then conducted to examine whether the interaction model is a better fit for the prognostic data. The interaction tests, specifying breast cancer related death as the endpoint, were conducted in a pooled dataset of ER-positive cases only and were stratified by study. *P* values for evaluation of proportional differences in SNP genotypes by clinical features were calculated using Pearson's chi-squared tests or chi-squared test for trend, the threshold for statistical significance was here set to 0.01.

***eQTL analysis***

In order to analyse the correlation between the loci of interest and gene expression we utilized the breast cancer sample data generated by the METABRIC project . We obtained the raw genotype data (Affymetrix SNP 6.0 platform) and normalized mRNA expression data (Illumina HT-12 v3 platform) extracted from matched DNA and RNA tumorous breast tissue specimens from altogether 1992 samples through European Genome-phenome Archive. A small subset of matched samples from normal breast tissue did not pass the subsequent genotype QC process. The raw genotype data was processed with Affymetrix Genotyping Console Software following best practices of SNP 6.0 analysis workflow provided by the program provider. The workflow included a quality control step with Contrast QC, a metric that captures the ability of an experiment to resolve SNP signals into three genotype clusters, applying the sample quality threshold of < 0.4 and genotype calling using Birdseed v2 including the genotypes with call rate of ≥95%. The normalization of mRNA expression data was performed by quantile normalization utilizing single target distribution, described in detail elsewhere .

**Visualisation of association results**

We used LocusZoom program to visualise association results from HEBCS and POSH GWS meta-analysis and includes both imputed and the genotyped SNPs 250 kb either side of the rs8113308.

**References**

1. Syrjäkoski K, Vahteristo P, Eerola H, Tamminen A, Kivinummi K, Sarantaus L, et al. Population-based study of BRCA1 and BRCA2 mutations in 1035 unselected Finnish breast cancer patients. J Natl Cancer Inst. 2000;92:1529-31.

2. Kilpivaara O, Bartkova J, Eerola H, Syrjäkoski K, Vahteristo P, Lukas J, et al. Correlation of CHEK2 protein expression and c.1100delC mutation status with tumor characteristics among unselected breast cancer patients. International journal of cancer Journal international du cancer. 2005;113:575-80.

3. Eerola H, Blomqvist C, Pukkala E, Pyrhonen S, Nevanlinna H. Familial breast cancer in southern Finland: how prevalent are breast cancer families and can we trust the family history reported by patients? European journal of cancer. 2000;36:1143-8.

4. Eccles D, Gerty S, Simmonds P, Hammond V, Ennis S, Altman DG. Prospective study of Outcomes in Sporadic versus Hereditary breast cancer (POSH): study protocol. BMC Cancer. 2007;7:160.

5. Rafiq S, Tapper W, Collins A, Khan S, Politopoulos I, Gerty S, et al. Identification of inherited genetic variations influencing prognosis in early onset breast cancer. Cancer Res. 2013.

6. Tryka KA, Hao L, Sturcke A, Jin Y, Wang ZY, Ziyabari L, et al. NCBI's Database of Genotypes and Phenotypes: dbGaP. Nucleic acids research. 2014;42:D975-9.

7. Aulchenko YS, Ripke S, Isaacs A, van Duijn CM. GenABEL: an R library for genome-wide association analysis. Bioinformatics. 2007;23:1294-6.

8. Dvinge H, Git A, Graf S, Salmon-Divon M, Curtis C, Sottoriva A, et al. The shaping and functional consequences of the microRNA landscape in breast cancer. Nature. 2013;497:378-82.

9. Curtis C, Shah SP, Chin SF, Turashvili G, Rueda OM, Dunning MJ, et al. The genomic and transcriptomic architecture of 2,000 breast tumours reveals novel subgroups. Nature. 2012;486:346-52.

10. Pruim RJ, Welch RP, Sanna S, Teslovich TM, Chines PS, Gliedt TP, et al. LocusZoom: regional visualization of genome-wide association scan results. Bioinformatics. 2010;26:2336-7.

**Supplementary Tables**

Supplementary Table S1. Univariate Cox’s regression analysis within estrogen receptor positive patients receiving endocrine treatment with stage-1 meta-analysis *P* value <1.0 x 10-4, *P*interaction < 1.0 × 10-3 and *P*heterogeneity < 0.01. In the table are presented the per study results separately for stage-1 datasets, HEBCS GWS and POSH GWS, along with the meta-analysis *P* values.

| **SNP** | **Chr** | **Positiona** | **Alleles** | **MAFb** | **HEBCS GWS**  **HR (95% CI)** | **HEBCS GWS *P*** | **POSH GWS**  **HR (95% CI)** | **POSH GWS *P*** | **Meta-analysis *P*** | ***P*heterogeneityc** | ***P*interactiond** | **Location** |
| --- | --- | --- | --- | --- | --- | --- | --- | --- | --- | --- | --- | --- |
| rs4082843 | 4 | 7109083 | GA | 0.164 | 0,40  (0.23-0.67) | 6.50 × 10-4 | 0,36  (0.15-0.82) | 0.015 | 2.93 × 10-5 | 0.002 | 1.92 × 10-4 | *GRPEL1 | SORCS2* |
| rs4767413 | 12 | 116951069 | CA | 0.178 | 2,06  (1.41-3.01) | 1.90 × 10-4 | 1,67  (1.08-2.57) | 0.021 | 1.47 × 10-5 | 0.009 | 1.53 × 10-4 | *MED13L | LINC00173* |
| rs11085098 | 19 | 4784553 | AG | 0.307 | 1,76  (1.25-2.47) | 0.001 | 1,61  (1.11-2.33) | 0.012 | 4.40 × 10-5 | 0.031 | 3.07 × 10-4 | *MIR7-3HG | FEM1A* |
| rs8113308 | 19 | 52445386 | AG | 0.152 | 1.72  (1.08 - 2.72) | 0.022 | 2.18  (1.39 - 3.43) | 7.40 × 10-4 | 5.90 × 10-5 | 0.005 | 7.40 × 10-4 | *ZNF613* |

aAccording to the human genome build 36.

bMinor allele frequency in Caucasian of European descent.

cHeterogeneity by endocrine treatment evaluating ER-positive endocrine treated subgroup and ER-positive subgroup not treated with endocrine therapy.

dInteraction with endocrine treatment in a pooled dataset comprising HEBCS and POSH GWS ER-positive cases.

Supplementary Table S2. Association for SNP rs8113308 with clinical and pathological features of the breast cancer tumors in a pooled set of HEBCS GWS, POSH GWS and POSH validation.

|  | **A/A** | | **A/G** | | **G/G** | |  |
| --- | --- | --- | --- | --- | --- | --- | --- |
|  | n | % | n | % | N | % | P |
| **Grade** |  |  |  |  |  |  |  |
| **1** | 199 | 10.3 | 60 | 9.8 | 3 | 4.0 | 0.234 |
| **2** | 693 | 35.8 | 219 | 35.7 | 27 | 36.0 |  |
| **3** | 1045 | 53.9 | 334 | 54.5 | 45 | 60.0 |  |
| **Tumor size** |  |  |  |  |  |  |  |
| **1** | 997 | 49.8 | 290 | 45.2 | 33 | 42.9 | 0.016a |
| **2** | 828 | 41.4 | 275 | 42.8 | 38 | 49.4 |  |
| **3** | 131 | 6.5 | 55 | 8.6 | 5 | 6.5 |  |
| **4** | 46 | 2.3 | 22 | 3.4 | 1 | 1.3 |  |
| **Nodal satus** |  |  |  |  |  |  |  |
| **Negative** | 900 | 45.6 | 298 | 47.2 | 35 | 47.3 | 0.754 |
| **Positive** | 1074 | 54.4 | 333 | 52.8 | 39 | 52.7 |  |
| **Metastasis at diagnosis** |  |  |  |  |  |  |  |
| **Negative** | 1922 | 95.9 | 613 | 95.3 | 74 | 94.9 | 0.762 |
| **Positive** | 82 | 4.1 | 30 | 4.7 | 4 | 5.1 |  |
| **ER status** |  |  |  |  |  |  |  |
| **Negative** | 676 | 34.3 | 220 | 35.0 | 19 | 25.0 | 0.219 |
| **Positive** | 1293 | 65.7 | 409 | 65.0 | 57 | 75.0 |  |
| **Pr status** |  |  |  |  |  |  |  |
| **Negative** | 760 | 45.5 | 244 | 45.0 | 24 | 40.0 | 0.693 |
| **Positive** | 909 | 54.5 | 298 | 55.0 | 36 | 60.0 |  |
| **Her2** |  |  |  |  |  |  |  |
| **Negative** | 1068 | 72.8 | 362 | 74.8 | 42 | 70.0 | 0.589 |
| **Positive** | 399 | 27.2 | 122 | 25.2 | 18 | 30.0 |  |

aChi squared for trend

Supplementary Table S3. Association for SNP rs4767413 with clinical and pathological features of the breast cancer tumors in a pooled set of HEBCS GWS, POSH GWS and POSH validation.

|  | **A/A** | | **A/G** | | **G/G** | |  |
| --- | --- | --- | --- | --- | --- | --- | --- |
|  | N | % | N | % | N | % | P |
| **Grade** |  |  |  |  |  |  |  |
| **1** | 164 | 10.3 | 71 | 10.0 | 11 | 14.7 | 0.196 |
| **2** | 588 | 37.0 | 242 | 34.1 | 32 | 42.7 |  |
| **3** | 838 | 52.7 | 397 | 55.9 | 32 | 42.7 |  |
| **Tumor size** |  |  |  |  |  |  |  |
| **1** | 810 | 49.1 | 357 | 48.7 | 40 | 50.6 | 0.565a |
| **2** | 686 | 41.6 | 299 | 40.8 | 35 | 44.3 |  |
| **3** | 109 | 6.6 | 60 | 8.2 | 2 | 2.5 |  |
| **4** | 46 | 2.8 | 17 | 2.3 | 2 | 2.5 |  |
| **Nodal satus** |  |  |  |  |  |  |  |
| **Negative** | 761 | 46.7 | 332 | 45.9 | 35 | 46.1 | 0.921 |
| **Positive** | 867 | 53.3 | 392 | 54.1 | 41 | 53.9 |  |
| **Metastasis at diagnosis** |  |  |  |  |  |  |  |
| **Negative** | 1582 | 95.5 | 706 | 96.2 | 74 | 93.7 | 0.506 |
| **Positive** | 75 | 4.5 | 28 | 3.8 | 5 | 6.3 |  |
| **ER status** |  |  |  |  |  |  |  |
| **Negative** | 552 | 34.1 | 247 | 34.1 | 20 | 26.0 | 0.335 |
| **Positive** | 1068 | 65.9 | 478 | 65.9 | 57 | 74.0 |  |
| **Pr status** |  |  |  |  |  |  |  |
| **Negative** | 639 | 46.1 | 254 | 42.4 | 25 | 37.3 | 0.142 |
| **Positive** | 746 | 53.9 | 345 | 57.6 | 42 | 62.7 |  |
| **Her2** |  |  |  |  |  |  |  |
| **Negative** | 877 | 73.9 | 396 | 72.7 | 51 | 76.1 | 0.773 |
| **Positive** | 310 | 26.1 | 149 | 27.3 | 16 | 23.9 |  |

aChi squared for trend

Supplementary Table S4. Cis eQTL analysis. Expression in ER positive breast tumor (N=821) and in ER negative breast tumor (N=321) from METABRIC. Genes within 100kb of the SNP rs8113308 were included in the analysis and shown in the table. SNP rs11881650 is a tag SNP for rs8113303 with r2 = 0.81.

|  |  |  | **ER positive** | |  | **ER negative** | |
| --- | --- | --- | --- | --- | --- | --- | --- |
| **SNP** | **gene** | **probe** | **F-test** | ***P* value** |  | **F-test** | ***P* value** |
| rs11881650 | ZNF350 | ILMN_1755850 | 5.596852 | 0.003853 |  | 0.361395 | 0.696989 |
| rs11881650 | ZNF613 | ILMN_1671895 | 1.247705 | 0.287709 |  | 0.056377 | 0.945192 |

Supplementary Table S5. Peripheral blood eQTL.

| **PValue** | **SNPName** | **SNPChr** | **SNPChrPos** | **SNPType** | **AlleleAssessed** | **OverallZScore** | **HUGO** | **FDR** | **r2** | **D’** |
| --- | --- | --- | --- | --- | --- | --- | --- | --- | --- | --- |
| 1.69E-05 | rs8113308 | 19 | 57137198 | T/C | C | 4.30263 | ZNF613 | 0.007862 | 1 | 1 |
| 0.003265 | rs7246064a | 19 | 57134074 | C/T | T | 2.941644 | ZNF350 | 0.481465 | 1 | 1 |
| 0.000721 | rs13343310 | 19 | 57125279 | C/T | T | -3.38172 | ZNF649 | 0.193882 | 0.353 | 1 |

aT-allele is the rare allele in CEU population.

Supplementary Table S6. Trans eQTL analysis. Expression in ER positive breast tumor (N=821) and in ER negative breast tumor (N=321) from METABRIC. The trans eQTL with Bonferroni adjusted *P* values < 0.05 are shown in the table. SNP rs11881650 is a tag SNP for rs8113303 with r2 = 0.81.

|  |  |  |  | **ER positive** | | | |  | **ER negative** | | |
| --- | --- | --- | --- | --- | --- | --- | --- | --- | --- | --- | --- |
| **SNP** | **probe** | **gene name** | **Cytoband** | **F-test** | ***P* value** | **Bonferroni adjusted**  ***P* value** | **FDR** |  | **F-test** | ***P* value** | **FDR** |
| rs11881650 | ILMN_1662950 | EPS8L1 | 19q13.42 | 14.2808 | 8.01 × 10-7 | 0.021 | 0.010 |  | 0.719 | 0.488 | 1.000 |
| rs11881650 | ILMN_1779522 | ZNF347 | 19q13.41 | 13.79422 | 1.28 × 10-6 | 0.021 | 0.013 |  | 0.636 | 0.530 | 1.000 |
| rs11881650 | ILMN_1651490 | CYP26A1 | 10q23.33 | 13.25741 | 2.16 × 10-6 | 0.026 | 0.020 |  | 3.267 | 0.039 | 0.840 |
