# Supplementary material for: Polymorphism at 19q13.41 Predicts Breast Cancer Survival Specifically after Endocrine Therapy
Source: Oxford University Press journal article supplement (doi:10.1158/1078-0432.ccr-15-0296), 2015-05-11
Supplement: 10780432ccr150296-sup-144653_1_supp_2945440_nn42ls.doc [file 10780432ccr150296-sup-144653_1_supp_2945440_nn42ls.doc]

**Legends to Supplementary Figures S1 to S6**

Supplementary Figure S1. REMARK diagram describing work flow and sample selection in this study.

Supplementary Figure S2. Kaplan-Meier plots of cumulative breast cancer specific 10-year survival of rs8113308 genotypes in HEBCS GWS among A) ER-positive patients receiving endocrine therapy, B) ER-negative patients and in in POSH GWS among C) ER-positive patients receiving endocrine therapy and D) ER-negative patients.

Supplementary Figure S3. Kaplan-Meier plots of cumulative 10-year survival of rs8113308 genotypes in POSH validation dataset among A) ER-positive patients receiving endocrine therapy, B) ER- negative patients and in SUCCESS-A dataset among C) ER-positive patients receiving endocrine therapy, D) ER- negative patients. In POSH validation: breast cancer specific 10-year survival and in SUCCESS-A: overall 10-year survival. Note that the y-axis minimum in all the plots is 0.5.

Supplementary Figure S4. Forest plots of hazard ratios and their confidence intervals separately for studies HEBCS GWS and POSH GWS (stage-1) and POSH validation and SUCCESS-A (stage-2) along with the meta-analysis *P*-value of the stage-1 and stage-2. The main analysis has been conducted using 10 year breast cancer specific survival (HEBCS GWS, POSH GWS and POSH validation) and overall survival for SUCCES-A. In addition the hazard ratios and their confidence intervals separately for all the four studies along with the meta-analysis P-values are shown for 10 year overall survival (all four studies) and 5 year disease free survival (all four studies) (end points: breast cancer death, local relapse and distant metastasis) in A) ER positive endocrine treated subgroup and B) ER negative subgroup. a10 year breast cancer specific survival. b10 year overall survival.

Supplementary Figure S5. Regional plot using *P*-values derived from univariate Cox’s regression model from HEBCS and POSH GWS meta-analysis and includes both imputed and the genotyped SNPs 250 kb either side of the rs8113308. The SNP rs8113308 is denoted with purple diamond (highlighted with red arrow). The plot was generated with LocusZoom program.

Supplementary Figure S6. Protein-protein interaction network. The protein-protein interaction network was generated by the STRING program after querying the ZNF350 gene. Data supporting the interactions were derived from experimental studies (pink lines), databases (blue lines) and text mining (green lines) demanding a high confidence score for interactions (0.700). The colour of the nodes does not encode any information.
